# Supplementary material for: An intact Mcm10 coiled-coil interaction surface is important for origin melting, helicase assembly and the recruitment of Pol-α to Mcm2–7
Source: PubMed Central journal article supplement — Nucleic Acids Res. 2017 May 16;45(12):7261–75. doi: 10.1093/nar/gkx438 (PMC5499591; doi:10.1093/nar/gkx438), 2017-05-16

## Supplementary Data

**Table S1, related to Experimental Procedures**

Oligonucleotides used in this study.

| DNA    | Sequences                                                                                                                                                              |
|--------|------------------------------------------------------------------------------------------------------------------------------------------------------------------------|
| ssDNA  | 5' T (TTT) <sub>26</sub> T 3' (80dT) or 5' ATGTCCTAGCAAGCCAGAATTCGGC 3' (25 nt)                                                                                        |
| blunt  | 5' ATGTCCTAGCAAGCCAGAATTCGGCAGCGTC 3'<br>5' GACGCTGCCGAATTCTGGCTTGCTAGGACAT 3'                                                                                         |
| bubble | 5' ATGTCCTAGCAAGCCAGAATTCGGCAGCGTCTT(TTT) <sub>26</sub> CCACGTCGGCGTCGCCACGAGC 3'<br>5' GCTCGTGGCGACGCCGACGTGGTT(TTT) <sub>26</sub> GACGCTGCCGAATTCTGGCTTGCTAGGACAT 3' |

**Table S2, related to Experimental Procedures**

Yeast strains used in this study.

| <b>Strain</b> | <b>Genotype</b>                                                                                                                                                               | <b>Source</b>                                                |
|---------------|-------------------------------------------------------------------------------------------------------------------------------------------------------------------------------|--------------------------------------------------------------|
| BY25924       | <i>MATa ura 3-1::GAL-OsTIR1-9MYC(URA3) mcm10::mcm10-1-aid (KanMX) cdc45::CDC45-5FLAG (hphNT) ade2-1 his3-11,15 leu2-3,112 trp1-1 ura3-1 can1-100</i>                          | Yeast Genetic Resource Center                                |
| BY25925       | <i>MATa ura 3-1::GAL-OsTIR1-9MYC(URA3) mcm10::mcm10-1-aid (KanMX) psf2::PSF2-5FLAG (hphNT) MCM4::mcm4-6ha (k.l. TRP1) ade2-1 his3-11,15 leu2-3,112 trp1-1 ura3-1 can1-100</i> | Yeast Genetic Resource Center                                |
| BY25926       | <i>MATa ura 3-1::GAL-OsTIR1-9MYC(URA3) mcm10::mcm10-1-aid (KanMX) rfa1::RFA1-5FLAG (HIS3) ade2-1 his3-11,15 leu2-3,112 trp1-1 ura3-1 can1-100</i>                             | Yeast Genetic Resource Center                                |
| RSY728        | <i>MATa bar1 his6 mcm5-bob1-1 leu2 ura3 lys2 his3-Δ1 cyh2</i>                                                                                                                 | Sclafani lab<br>(Sclafani, R.A. <i>et al.</i> 2002 Genetics) |
| PP3278        | <i>MATa ura 3-1::GAL-OsTIR1-9MYC(URA3) mcm10::mcm10-1-aid (KanMX) mcm5::mcm5-bob1-1 ade2-1 his3-11,15 leu2-3,112 trp1-1 ura3-1 can1-100</i>                                   | Perez-Arnaiz 2016                                            |

**Figure S1. Mcm10-2D is defective in self-interaction and in DNA, Mcm2-7 and Mcm2 in binding *in vitro*.** **A.** 30 pmoles of *wild-type* GST-Mcm10, GST-Mcm10-2D, GST-Mcm10-4A or GST tag was incubated with increasing concentrations of radiolabeled *wild-type* PKA-Mcm10, PKA-Mcm10-2D or PKA-Mcm10-4A at 30°C for 10 minutes in a GST pulldown assay. The products of the pulldown were analyzed by SDS-PAGE followed by phosphorimaging. Results from similar experiments were quantified, averaged and plotted. **B.** 30 pmoles of *wild-type* GST-Mcm10, GST-Mcm10-2D or GST tag was incubated with increasing concentrations of radiolabeled ssDNA at 30°C for 10 minutes in a GST pulldown assay. The products of the pulldown were analyzed by SDS-PAGE followed by phosphorimaging. Results from similar experiments were quantified, averaged and plotted. **C.** 30 pmoles of *wild-type* GST-Mcm10, GST-Mcm10-2D or GST tag was incubated with increasing concentrations of radiolabeled bubble DNA at 30°C for 10 minutes in a GST pulldown assay. The products of the pulldown were analyzed by SDS-PAGE followed by phosphorimaging. Results from similar experiments were quantified, averaged and plotted. **D.** 30 pmoles of *wild-type* GST-Mcm10, GST-Mcm10-2D or GST tag was incubated with increasing concentrations of radiolabeled dsDNA at 30°C for 10 minutes in a GST pulldown assay. The products of the pulldown were analyzed by SDS-PAGE followed by phosphorimaging. Results from similar experiments were quantified, averaged and plotted. **E.** 30 pmoles of *wild-type* GST-Mcm10, GST-Mcm10-2D or GST tag was incubated with increasing concentrations of radiolabeled PKA-Mcm2-7 at 30°C for 10 minutes in a GST pulldown assay. The products of the pulldown were analyzed by SDS-PAGE followed by phosphorimaging. Results from similar experiments were quantified, averaged and plotted. Graphs from (A), (B), (C), (D), and (E) represent mean values from two independent experiments and error bars indicate the standard deviation of the mean.

**Figure S2. Plasmid copy of *mcm10* from GalS promoter is expressed at *wild-type* levels.** **A.** *mcm10-1-aid* cells (in the absence of IAA) and *mcm10-1-aid* cells expressing *MCM10-WT* under the control of the GalS promoter (in the presence of IAA and Gal) were grown as described in Material and Methods. Whole cell extracts were analyzed by Western blot for the expression of Mcm10. Results from similar experiments were quantified, averaged and plotted. Graph represents mean values from two independent experiments and error bars indicate the standard deviation of the mean.

**Figure S3. The presence of *mcm5-bob1* mutation partially suppresses the growth defect observed in cells expressing *mcm2-2A*.** **A.** 10-fold serial dilution analysis of budding yeast *mcm10-1-aid* cells expressing *MCM2-WT* and *mcm2-2A* from the GAL-S plasmid inducible promoter system (pRS415). Plates were incubated for 3 days at 25°C. **B.** similar to A, except the cells harbored the *mcm5-bob1* mutation.

**Figure S4. An intact Mcm10 coiled-coil interaction surface is important for cell growth.** 10-fold serial dilution analysis of budding yeast *mcm10-1-aid* cells expressing *MCM10-WT*, *mcm10-4A*, vector, or *mcm10-D1-150*. *MCM10* was expressed from either the GAL-S plasmid inducible promoter system (pRS415) or from *MCM10* native promoter. Plates were incubated for 3 days at 25°C.

**A**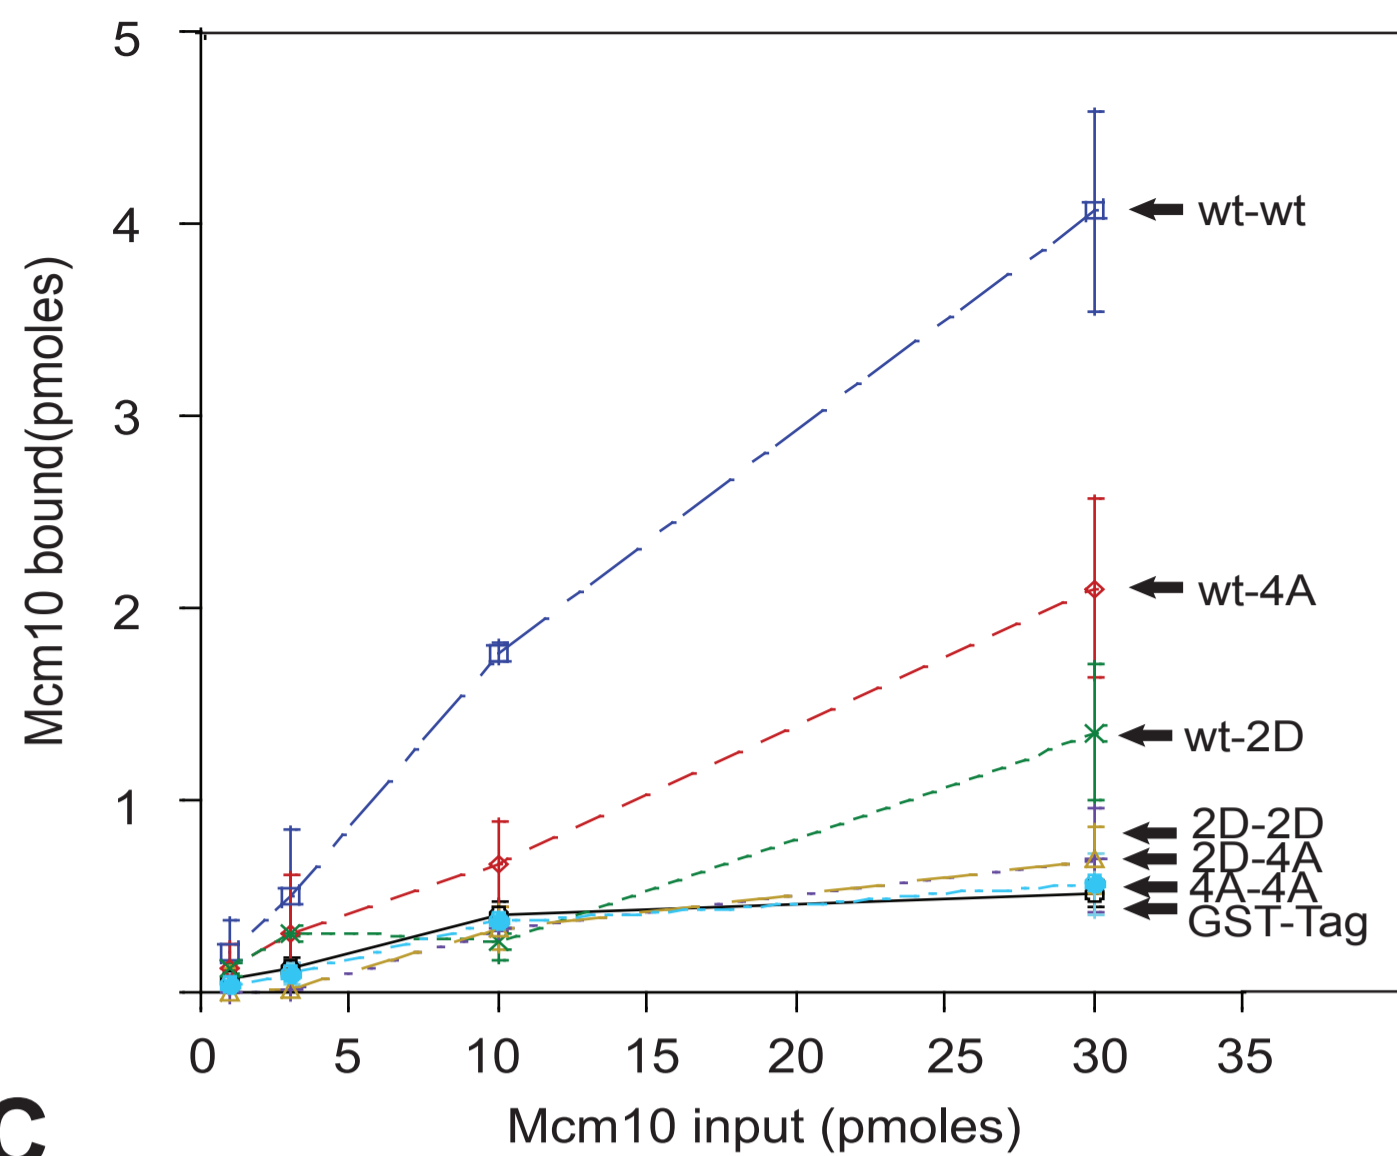**B**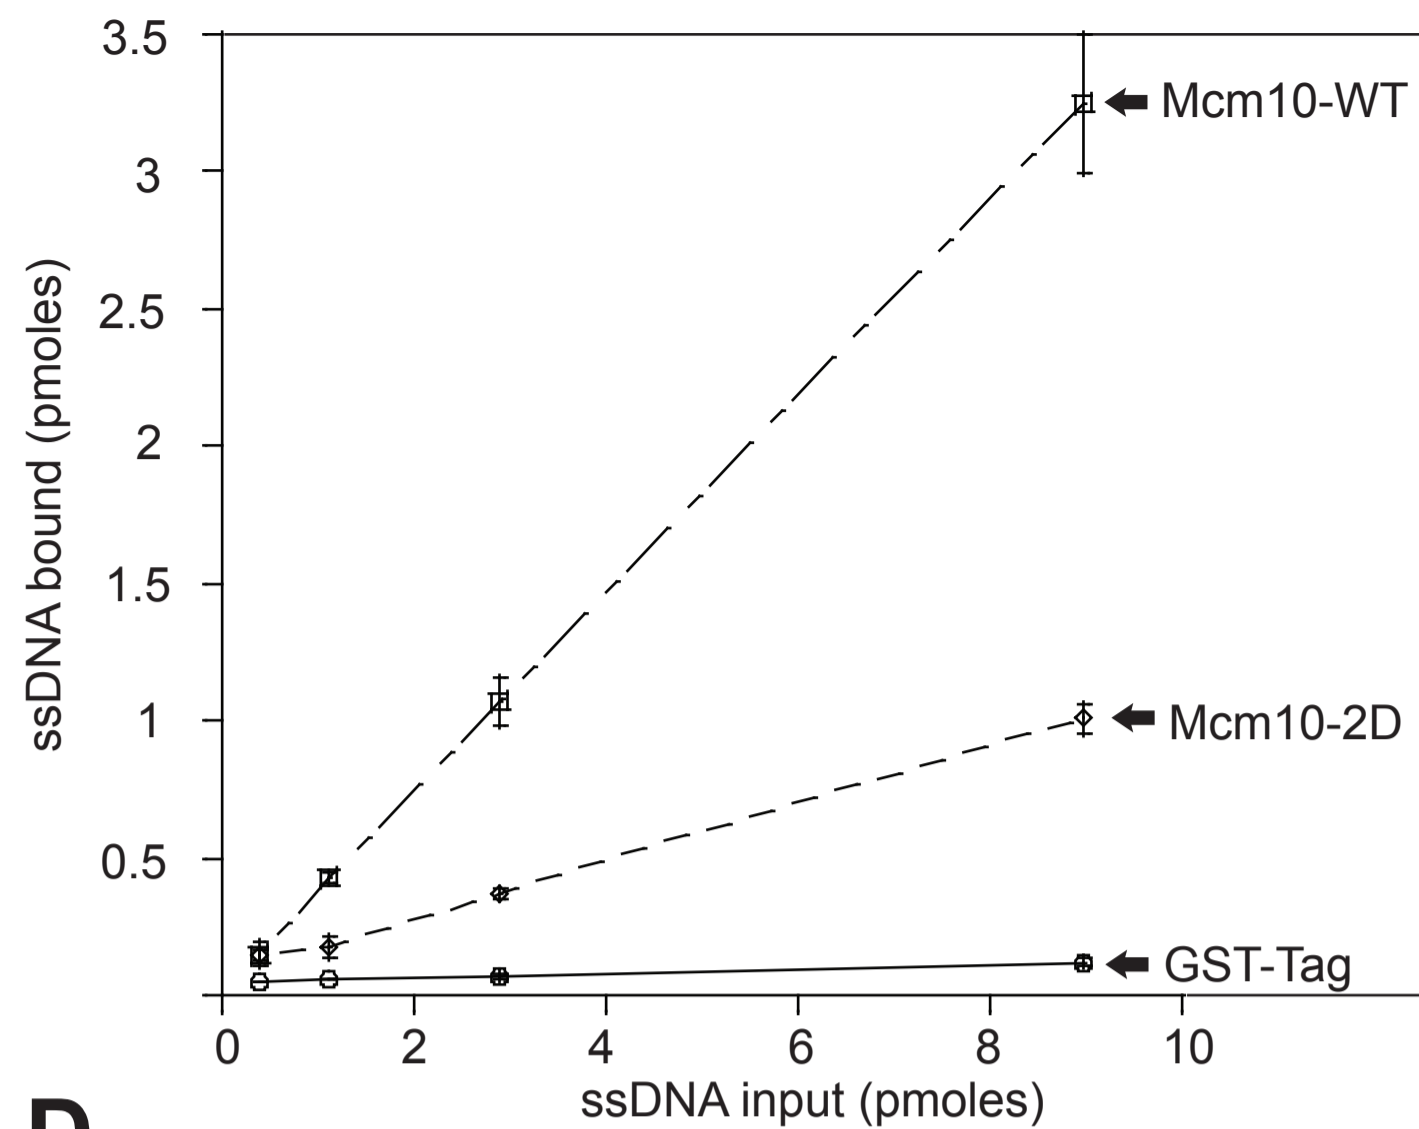**C**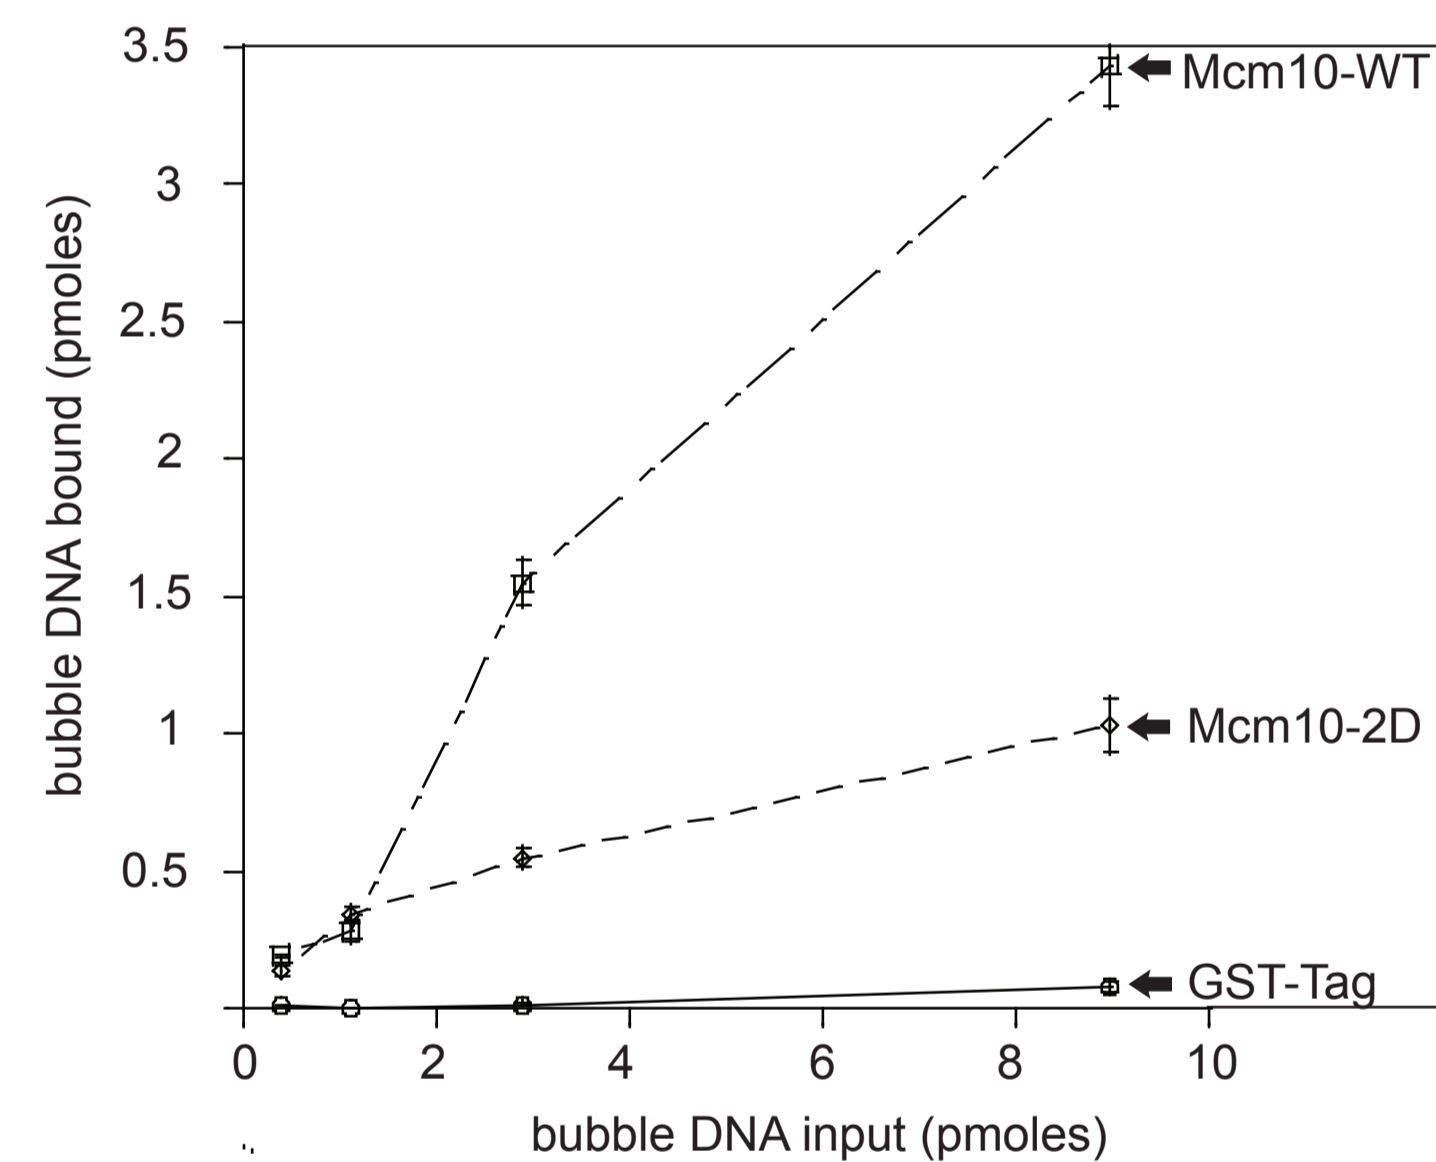**D**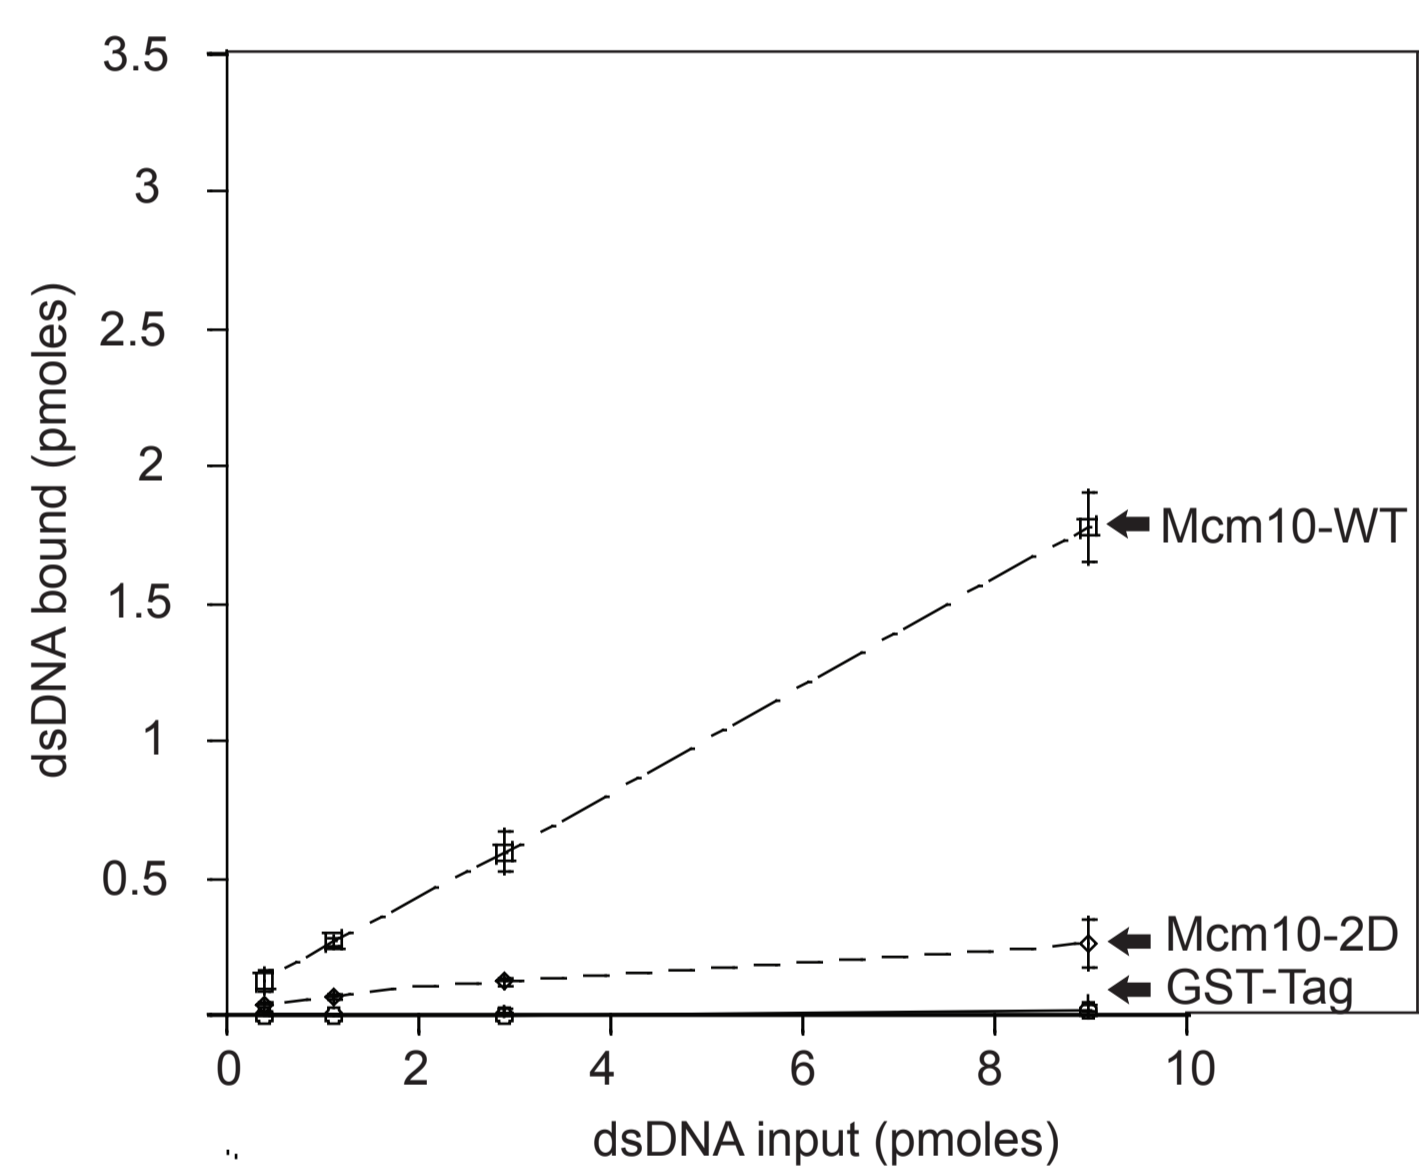**E**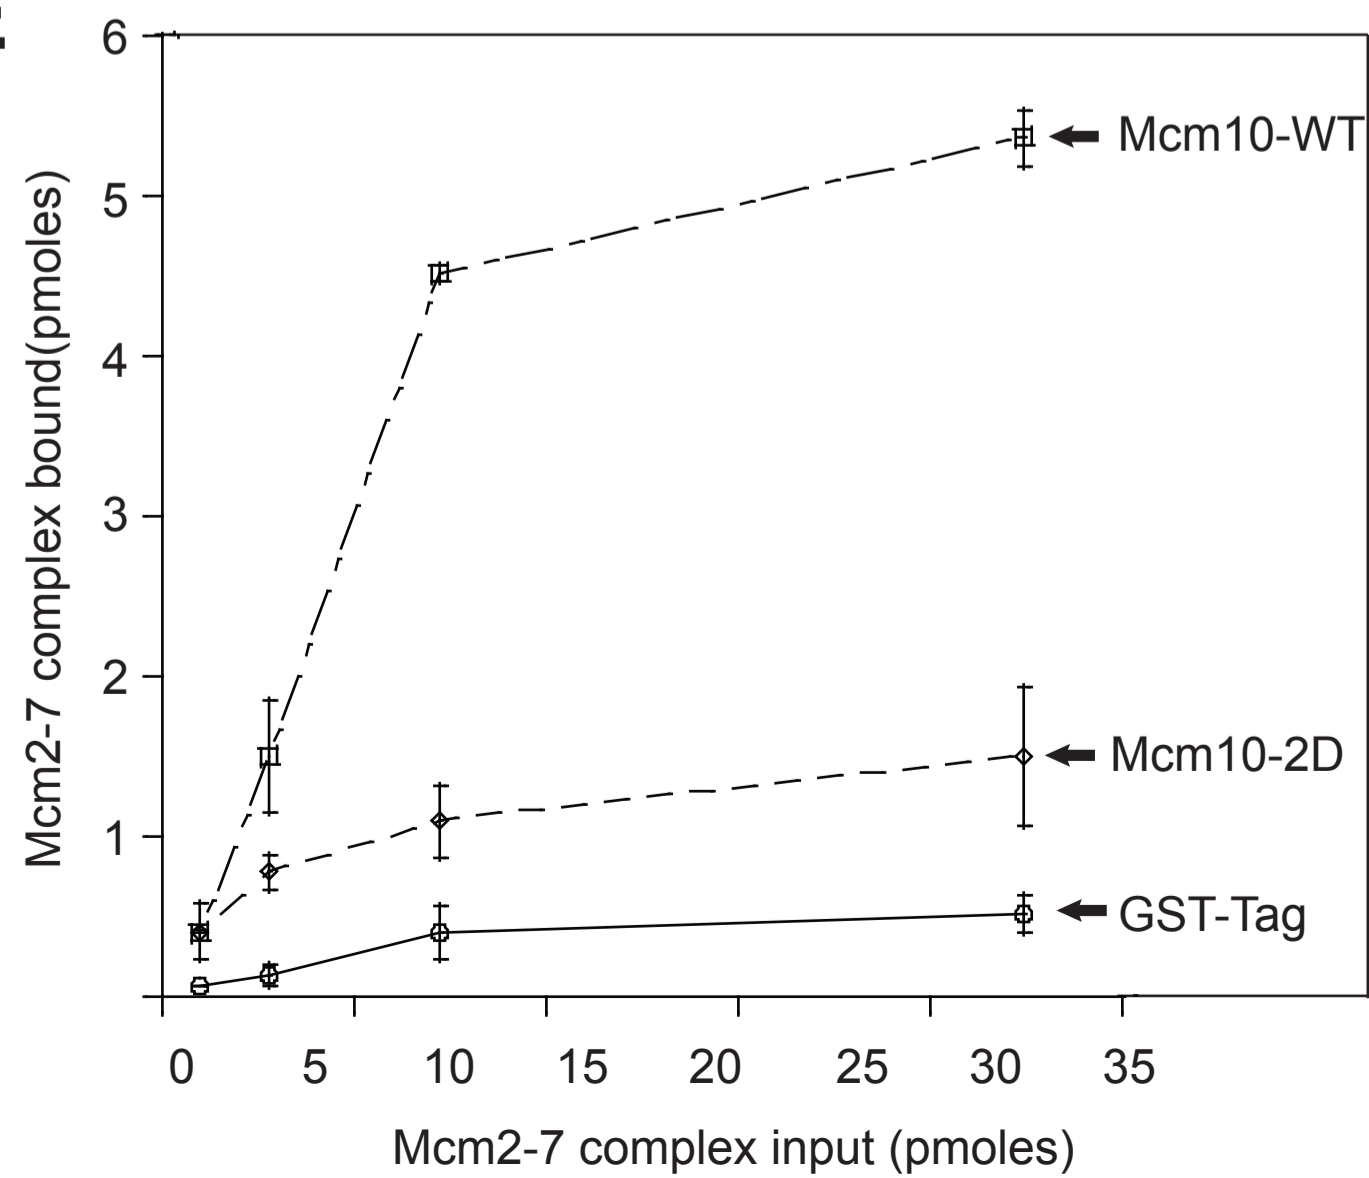

# Perez-Arnaiz Figure S2

## A

Whole Cell Extracts

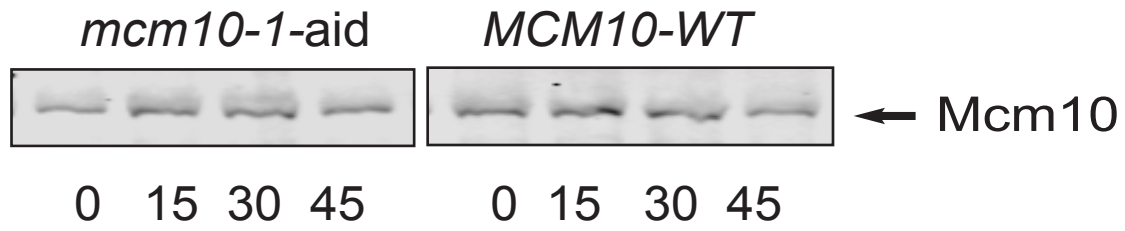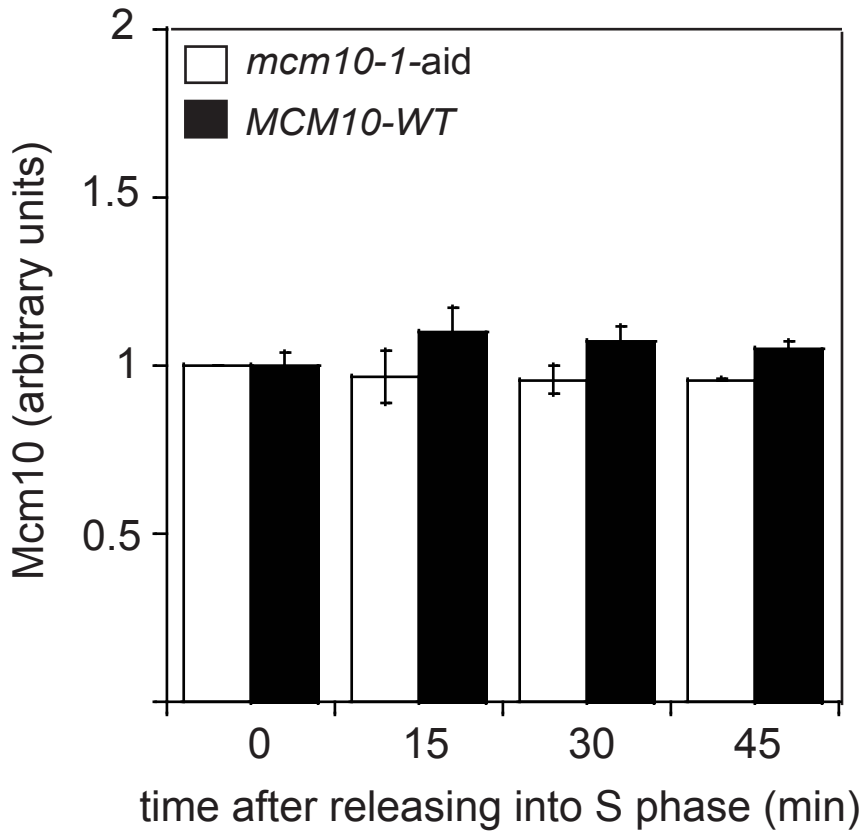

# Perez-Arnaiz Figure S3

## A

*mcm10-1-aid MCM5-WT* background

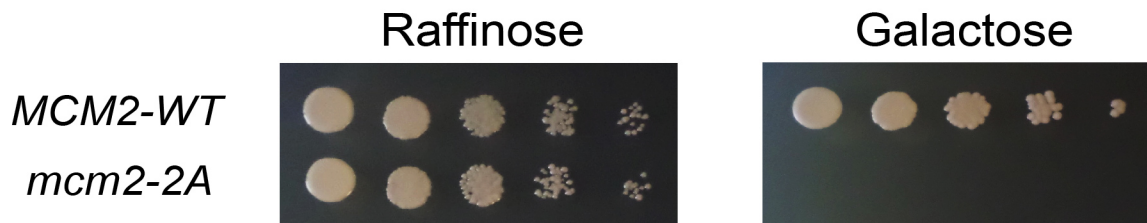

## B

*mcm10-1-aid mcm5-bob1* background

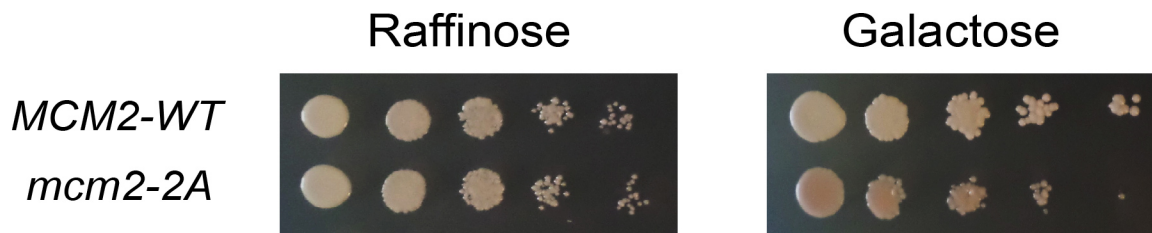

# Perez-Arnaiz Figure S4

Permissive Conditions  
Gal Promoter

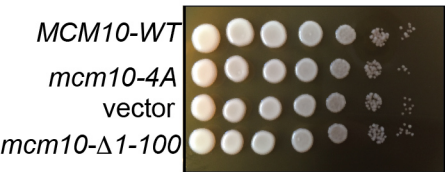

Permissive Conditions  
Native Promoter

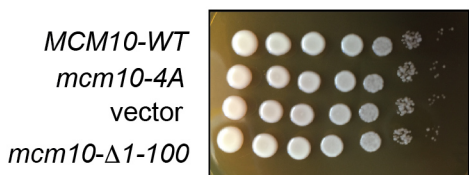

Restrictive Conditions  
Gal Promoter

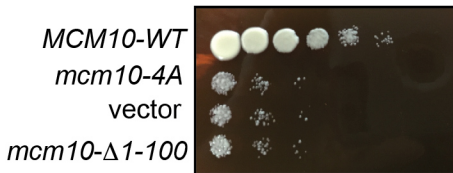

Restrictive Conditions  
Native Promoter

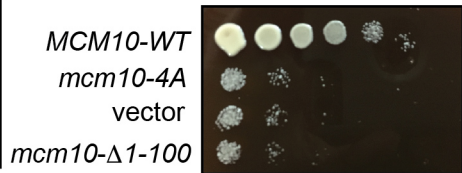

Supplement: gkx438_Supp.pdf [file gkx438_Supp.pdf]
